# Supplementary material for: Self assembled CdLa2S4hexagon flowers, nanoprisms and nanowires: novel photocatalysts for solar hydrogen production
Source: Royal Society of Chemistry journal article supplement (doi:10.1039/c0jm02890h), 2010-12-23

## Supporting Information

### S-1 : INDEXING OF PEAKS FROM VALUE OF a FOR CUBIC STRUCTURE

$$a=8.7033 \text{ \AA}$$

| hkl | $N=h^2+k^2+l^2$ | d     | 2 $\theta$ obs | 2 $\theta$ obs for nanowires | $\Delta 2\theta$ for nanowires | (%I) nanowires | 2 $\theta$ obs for prisms and Hexagons | $\Delta 2\theta$ for prisms and Hexagons | (%I) prisms and Hexagons |
|-----|-----------------|-------|----------------|------------------------------|--------------------------------|----------------|----------------------------------------|------------------------------------------|--------------------------|
| 100 | 1               | 8.700 | 10.159         |                              |                                |                | 9.839                                  | 0.320                                    | 10.8                     |
| 111 | 3               | 5.023 | 17.642         | 18.078                       | -0.436                         | 100            | 17.673                                 | -0.031                                   | 35.2                     |
| 120 | 5               | 3.891 | 22.835         |                              |                                |                | 24.360                                 | -1.525                                   | 72.5                     |
| 121 | 6               | 3.552 | 25.047         |                              |                                |                | 24.910                                 | 0.137                                    | 12.1                     |
| 220 | 8               | 3.076 | 28.997         | 27.5557                      | 1.440                          | 97.8           | 28.056                                 | 0.941                                    | 12.7                     |
| 300 | 9               | 2.900 | 30.796         |                              |                                |                | 30.275                                 | 0.521                                    | 100                      |
| 222 | 12              | 2.512 | 35.699         | 36.392                       | -0.693                         | 92.3           | 35.829                                 | -0.130                                   | 13.1                     |
| 321 | 14              | 2.325 | 38.659         |                              |                                |                | 38.708                                 | -0.049                                   | 3.7                      |
| 401 | 17              | 2.110 | 42.767         |                              |                                |                | 42.887                                 | -0.120                                   | 30.5                     |
| 303 | 18              | 2.051 | 44.063         | 44.130                       | -0.067                         | 97.3           | 43.802                                 | 0.261                                    | 59.2                     |
| 420 | 20              | 1.945 | 46.567         |                              |                                |                | 46.726                                 | -0.159                                   | 33.8                     |
| 421 | 21              | 1.899 | 47.779         |                              |                                |                | 48.125                                 | -0.346                                   | 6                        |
| 332 | 22              | 1.855 | 48.967         |                              |                                |                | 49.923                                 | -0.956                                   | 10.8                     |
| 422 | 24              | 1.776 | 51.276         | 51.952                       | -0.676                         | 92.7           | 51.920                                 | -0.644                                   | 9.8                      |
| 501 | 26              | 1.706 | 53.508         |                              |                                |                | 53.397                                 | 0.111                                    | 16.4                     |
| 511 | 27              | 1.674 | 54.597         |                              |                                |                | 54.926                                 | -0.329                                   | 2.2                      |
| 521 | 30              | 1.588 | 57.773         |                              |                                |                | 57.050                                 | 0.723                                    | 10.3                     |
| 522 | 33              | 1.515 | 60.827         |                              |                                |                | 60.964                                 | -0.137                                   | 7.4                      |
| 531 | 35              | 1.471 | 62.805         |                              |                                |                | 62.931                                 | -0.126                                   | 8.3                      |
| 602 | 40              | 1.376 | 67.572         |                              |                                |                | 67.920                                 | -0.348                                   | 4.3                      |
| 533 | 43              | 1.327 | 70.330         |                              |                                |                | 70.801                                 | -0.471                                   | 11.3                     |
| 622 | 44              | 1.312 | 71.234         |                              |                                |                | 72.115                                 | -0.881                                   | 3.5                      |
| 711 | 51              | 1.218 | 77.379         |                              |                                |                | 77.428                                 | -0.049                                   | 4.5                      |
| 702 | 53              | 1.195 | 79.083         |                              |                                |                | 79.201                                 | -0.118                                   | 6.2                      |

## S2: Intermediate information of formation mechanism

### a. The intermediate stage for formation of flowers of hexagons.

The following FESEM image shows the intermediate stage of formation of flowers of hexagons. The image clearly shows that the growth of hexagons originating from the spherical nanoparticles and these hexagons self organized into spherical assemblies. On the basis of these careful observations of image of the product obtained at 60 hr duration in aqueous medium, the mechanism for formation of flowers of hexagons has been proposed in the scheme **1a**.

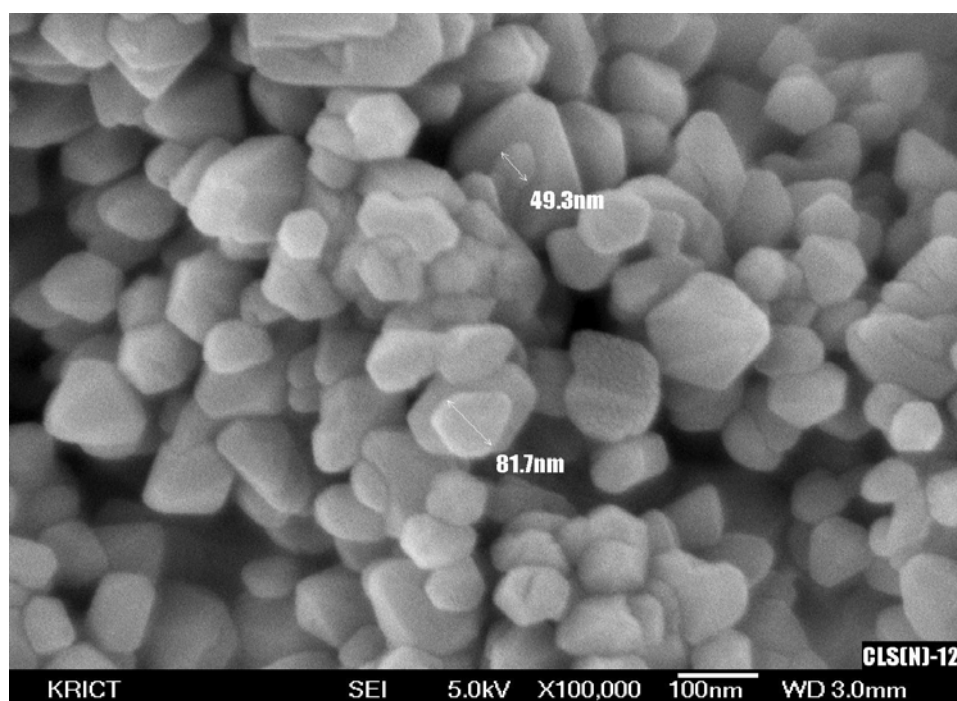

### b. The formation of nanoprisms.

The following FESEM image represents the product obtained at 60 hr duration in methanol medium with 0.01 M precursor concentration. This image clearly shows cluster of small nanoparticles and some of them transformed into prism. The effect of methanol (reduction in size) is already explained in main text. On the basis of this observation, we proposed authentic mechanism for formation of nano prisms as presented in **scheme 1b**.

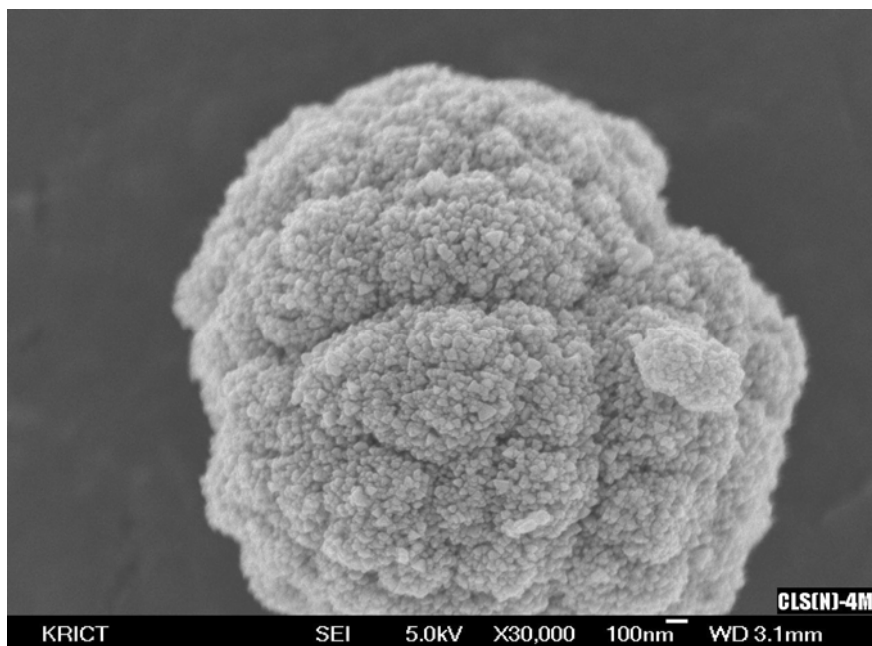

### c. The formation of nanowires.

The following FESEM image represent the product obtained at 60 hr in methanol medium with 0.005 M precursor concentration. This image clearly shows spherical nanoparticles ( shown by arrows ) self aligned in the form of nanowires. This indicates that at longer reaction time all self aligned spherical nanoparticles transformed into nanowires. At lower concentration in methanol medium, the growth of the nanoparticles slows down and hence one dimensional growth accelerated.via self alignment of spherical nanoparticles. On the basis of these careful observations, we proposed authentic mechanism for formation of nanowires as presented in **scheme1c**

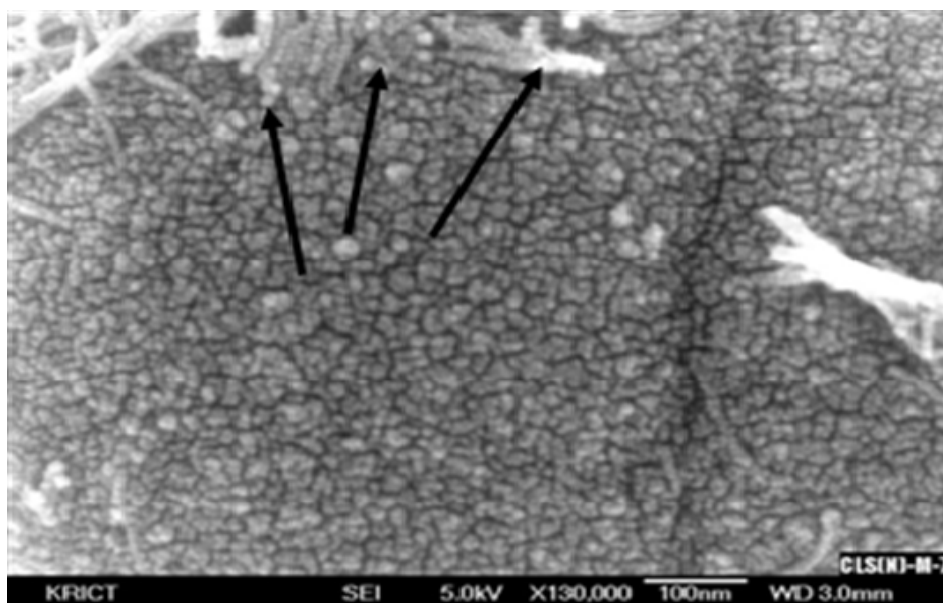

Supplement: c0jm02890h.pdf [file c0jm02890h.pdf]
